# Supplementary material for: Magnetic and relaxation properties of vanadium(iv) complexes: an integrated 1H relaxometric, EPR and computational study
Source: Royal Society of Chemistry journal article supplement (doi:10.1039/d2qi02635j), 2023-01-01
Supplement: d2qi02635j1.pdf [file d2qi02635j1.pdf]

## Electronic Supplementary Information (ESI)

### **Magnetic and relaxation properties of Vanadium(IV) complexes: An integrated $^1\text{H}$ relaxometric, EPR and DFT study**

*Valeria Langostina,<sup>a</sup> Fabio Carniato,<sup>b</sup> David Esteban-Gómez,<sup>c</sup> Carlos Platas-Iglesias\*,<sup>c</sup> Mario Chiesa\*<sup>a</sup> and Mauro Bottà\*<sup>b</sup>*

*<sup>a.</sup> Department of Chemistry, University of Turin, Via Giuria 9, 10125 Torino, Italy. E-mail: mario.chiesa@unito.it*

*<sup>b.</sup> Dipartimento di Scienze e Innovazione Tecnologica, Università del Piemonte Orientale "A. Avogadro", Viale T. Michel 11, 15121 Alessandria, Italy. E-mail: mauro.botta@uniupo.it*

*<sup>c.</sup> Universidade da Coruña, Centro de Investigacións Científicas Avanzadas (CICA) and Departamento de Química, Facultade de Ciencias, 15071, A Coruña, Galicia, Spain.*

## Contents:

|                                                                                                                                                                                                                                                                                                                                                                                                                             |    |
|-----------------------------------------------------------------------------------------------------------------------------------------------------------------------------------------------------------------------------------------------------------------------------------------------------------------------------------------------------------------------------------------------------------------------------|----|
| Figure S1. X-band CW EPR spectra of $[\text{VO}(\text{H}_2\text{O})_5]^{2+}$ at variable temperature experimental (black) and simulation (red) 10 mW power and 0.5 mT modulation amplitude.....                                                                                                                                                                                                                             | 4  |
| Figure S2. X-band CW EPR spectra of $[\text{VO}(\text{ox})_2]^{2-}$ at variable temperature experimental (black) and simulation (red) 10 mW power and 0.5 mT modulation amplitude. ....                                                                                                                                                                                                                                     | 5  |
| Figure S3. X-band CW EPR spectra of $[\text{VO}(\text{dtpa})]^{3-}$ at variable temperature experimental (black) and simulation (red) 10 mW power and 0.5 mT modulation amplitude.....                                                                                                                                                                                                                                      | 6  |
| Figure S4. Rotational correlation time as a function of temperature of $[\text{VO}(\text{H}_2\text{O})_5]^{2+}$ (black), $[\text{VO}(\text{dtpa})]^{3-}$ (blue), $[\text{VO}(\text{ox})_2]^{2-}$ (orange) and $[\text{VO}(\text{nta})]^-$ (green). ...                                                                                                                                                                      | 7  |
| Figure S5. Plots of the rotational correlation time as a function of temperature for $[\text{VO}(\text{H}_2\text{O})_5]^{2+}$ (black), $[\text{VO}(\text{dtpa})]^{3-}$ (blue), $[\text{VO}(\text{ox})_2]^{2-}$ (orange) and $[\text{VO}(\text{nta})]^-$ (green). The slopes of the linear fits ( $E_R/R$ ) were used to calculate the activation energy for rotation, while the intercepts afford $\ln(\tau_R^{298})$ . ... | 8  |
| Figure S6. Variable Temperature electron spin echo decay (left) and inversion recovery (right) data for $[\text{VO}(\text{H}_2\text{O})_5]^{2+}$ at 1215 mT and 33.985 GHz: 20 K (blue), 50 K (light blue), 80 K (green), 120 K (yellow), 150 K (orange) and 200 K (red). .                                                                                                                                                 | 9  |
| Figure S7 Variable Temperature electron spin echo decay (left) and inversion recovery (right) data for $[\text{VO}(\text{ox})_2]^{2-}$ at 1206 mT and 33.748 GHz: 20 K (blue), 50 K (light blue), 80 K (green), 120 K (yellow), 150 K (orange) and 200 K (red). .                                                                                                                                                           | 9  |
| Figure S8. Variable Temperature electron spin echo decay (left) and inversion recovery (right) data for $[\text{VO}(\text{nta})]^-$ at 1207 mT and 33.748 GHz: 20 K (blue), 50 K (light blue), 80 K (green), 120 K (yellow), 150 K (orange) and 200 K (red). ....                                                                                                                                                           | 10 |
| Figure S9. Variable Temperature electron spin echo decay (left) and inversion recovery (right) data for $[\text{VO}(\text{dtpa})]^{3-}$ at 1209 mT and 33.827 GHz: 20 K (blue), 50 K (light blue), 80 K (green), 120 K (yellow), 150 K (orange) and 200 K (red). ....                                                                                                                                                       | 10 |
| Figure S10. Variable Temperature electron spin echo decay (left) and inversion recovery (right) data for $[\text{VO}(\text{acac})_2]$ at 1206 mT and 33.693 GHz: 20 K (blue), 50 K (light blue), 80 K (green), 120 K (yellow), 150 K (orange) and 200 K (red).....                                                                                                                                                          | 11 |
| Table S1. Rotational correlation time ( $\tau_R$ ( $10^{-11}$ s)) of VO-complexes calculated by EasySpin simulations. ....                                                                                                                                                                                                                                                                                                  | 11 |
| Table S2. $T_1^e$ and amplitude fitting values for VO-complexes.....                                                                                                                                                                                                                                                                                                                                                        | 12 |

|                                                                                                                                                                  |    |
|------------------------------------------------------------------------------------------------------------------------------------------------------------------|----|
| Table S3. $T_m^e$ and stretch fitting values as a function of temperature for VO <sup>2+</sup> complexes. ....                                                   | 13 |
| Table S4. Cartesian coordinates (Å) obtained with DFT calculations for the [VO(H <sub>2</sub> O) <sub>5</sub> ] <sup>2+</sup> system.....                        | 14 |
| Table S5. Cartesian coordinates (Å) obtained with DFT calculations for the [VO(nta)(H <sub>2</sub> O)] <sup>-</sup> system.....                                  | 15 |
| Table S6. Cartesian coordinates (Å) obtained with DFT calculations for the [VO(nta)(H <sub>2</sub> O)] <sup>-</sup> ·2H <sub>2</sub> O system.....               | 16 |
| Table S7. Cartesian coordinates (Å) obtained with DFT calculations for the [VO(Hdtpa)] <sup>2-</sup> system.....                                                 | 17 |
| Table S8. Cartesian coordinates (Å) obtained with DFT calculations for the [VO(ox) <sub>2</sub> (H <sub>2</sub> O)] <sup>2-</sup> system.....                    | 18 |
| Table S9. Cartesian coordinates (Å) obtained with DFT calculations for the [VO(ox) <sub>2</sub> (H <sub>2</sub> O)] <sup>2-</sup> ·2H <sub>2</sub> O system..... | 19 |
| Table S10. Cartesian coordinates (Å) obtained with DFT calculations for the [VO(acac) <sub>2</sub> (H <sub>2</sub> O)] system.....                               | 20 |
| Table S11. Cartesian coordinates (Å) obtained with DFT calculations for the [VO(acac) <sub>2</sub> (H <sub>2</sub> O)]·2H <sub>2</sub> O system.....             | 21 |

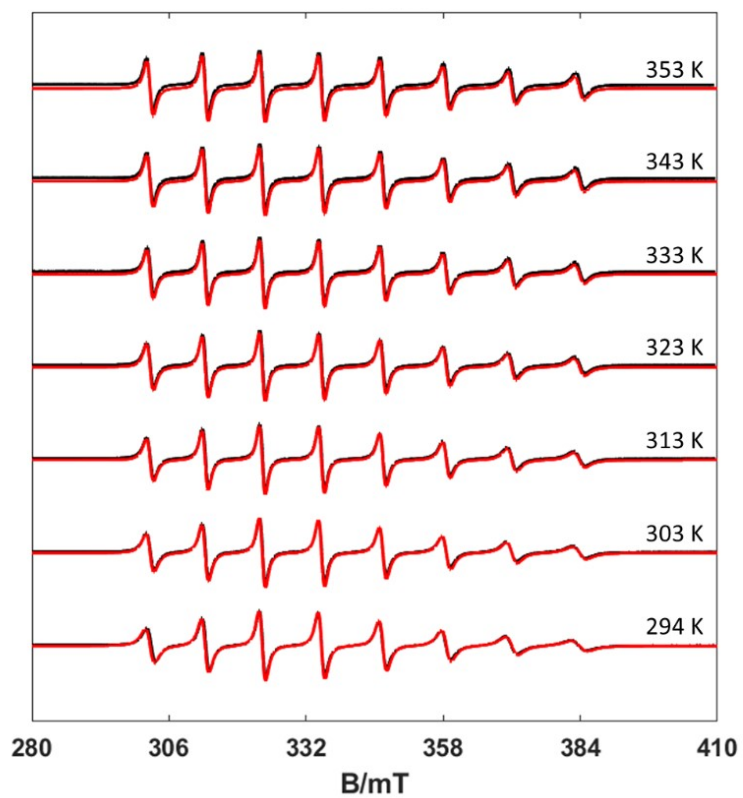

**Figure S1.** X-band CW EPR spectra of  $[\text{VO}(\text{H}_2\text{O})_5]^{2+}$  at variable temperature experimental (black) and simulation (red) 10 mW power and 0.5 mT modulation amplitude.

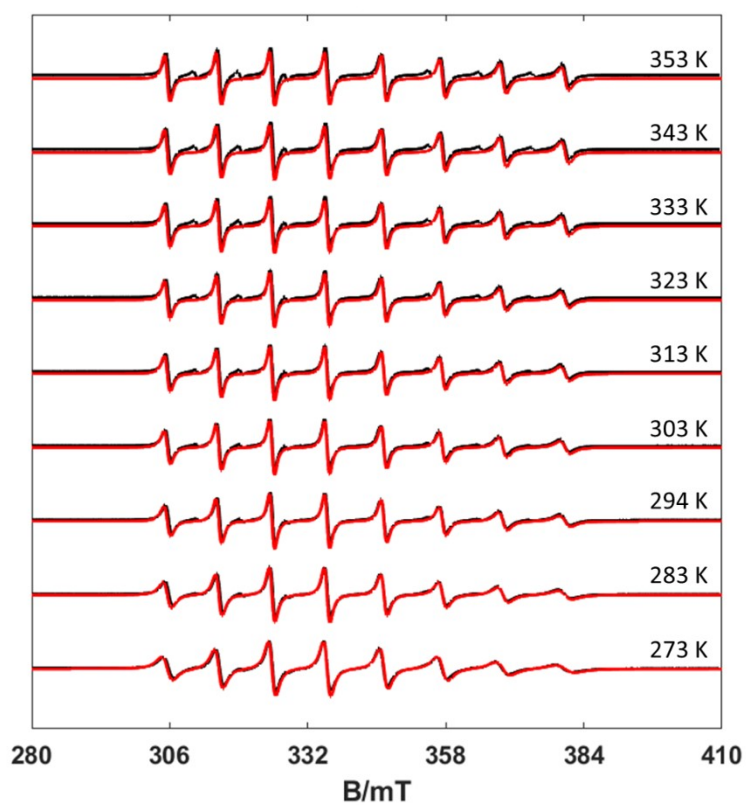

**Figure S2.** X-band CW EPR spectra of  $[\text{VO}(\text{ox})_2]^{2-}$  at variable temperature experimental (black) and simulation (red) 10 mW power and 0.5 mT modulation amplitude.

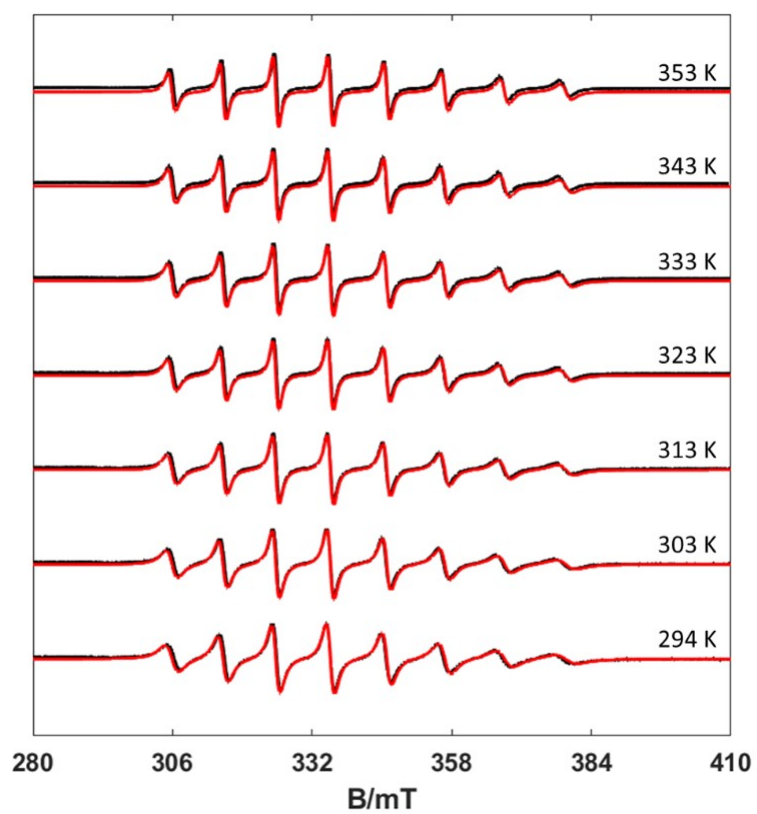

**Figure S3.** X-band CW EPR spectra of  $[\text{VO}(\text{dtpa})]^{3-}$  at variable temperature experimental (black) and simulation (red) 10 mW power and 0.5 mT modulation amplitude.

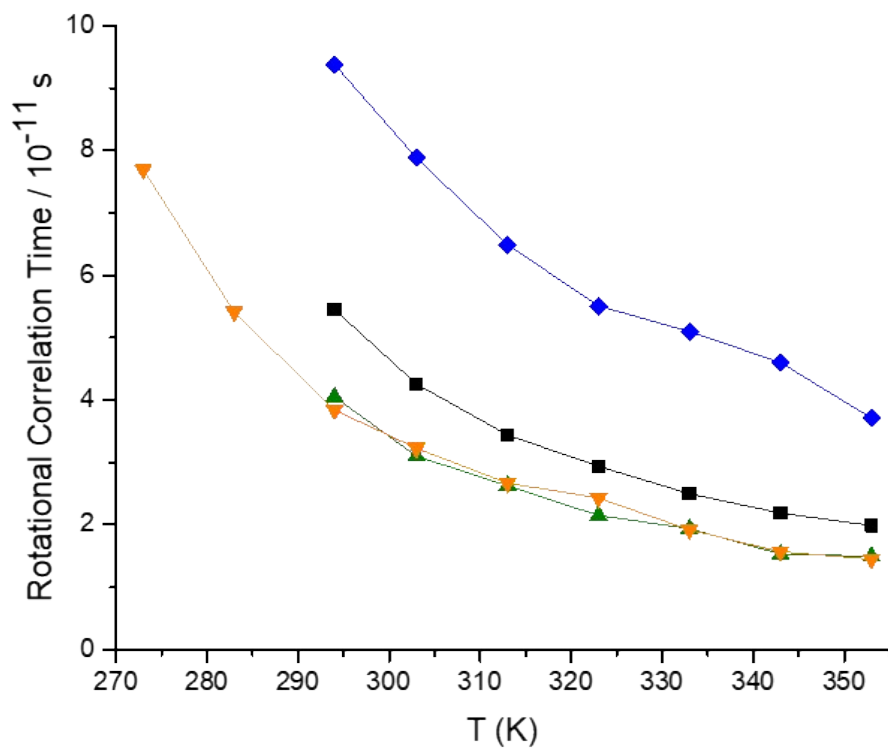

**Figure S4.** Rotational correlation time as a function of temperature of  $[\text{VO}(\text{H}_2\text{O})_5]^{2+}$  (black),  $[\text{VO}(\text{dtpa})]^{3-}$  (blue),  $[\text{VO}(\text{ox})_2]^{2-}$  (orange) and  $[\text{VO}(\text{nta})]^-$  (green).

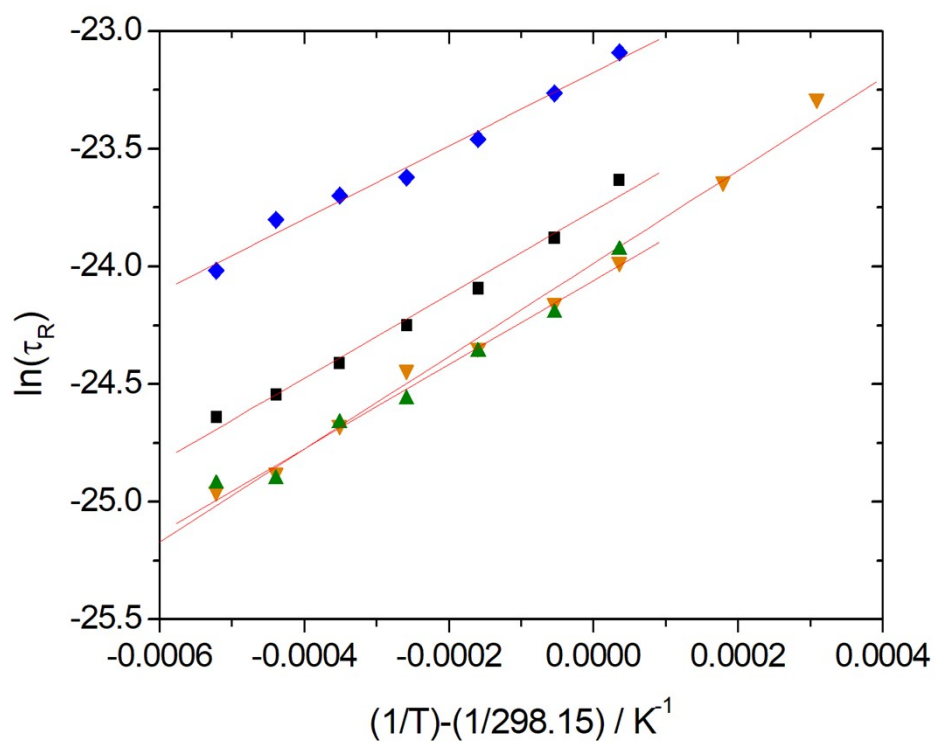

**Figure S5.** Plots of the rotational correlation time as a function of temperature for  $[\text{VO}(\text{H}_2\text{O})_5]^{2+}$  (black),  $[\text{VO}(\text{dtpa})]^{3-}$  (blue),  $[\text{VO}(\text{ox})_2]^{2-}$  (orange) and  $[\text{VO}(\text{nta})]^-$  (green). The slopes of the linear fits ( $E_R/R$ ) were used to calculate the activation energy for rotation, while the intercepts afford  $\ln(\tau_R^{298})$ .



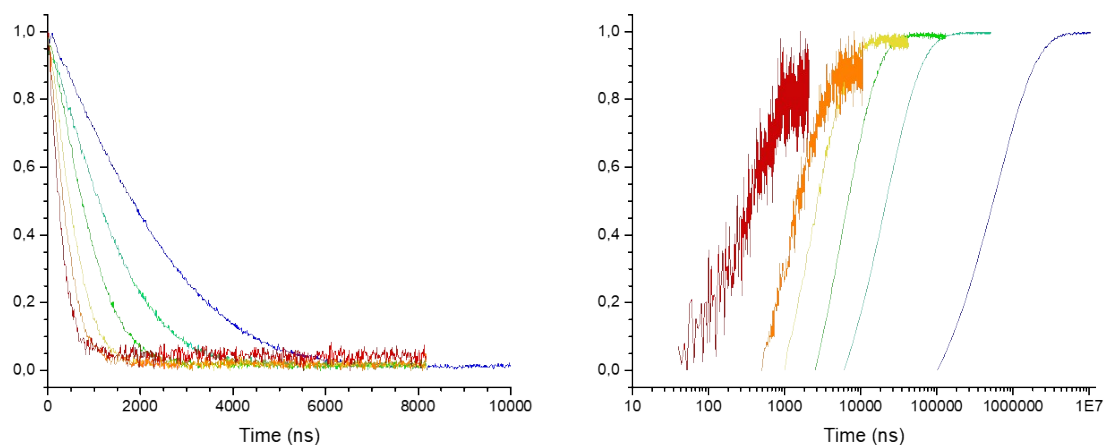

**Figure S6.** Variable Temperature electron spin echo decay (left) and inversion recovery (right) data for  $[\text{VO}(\text{H}_2\text{O})_5]^{2+}$  at 1215 mT and 33.985 GHz: 20 K (blue), 50 K (light blue), 80 K (green), 120 K (yellow), 150 K (orange) and 200 K (red).

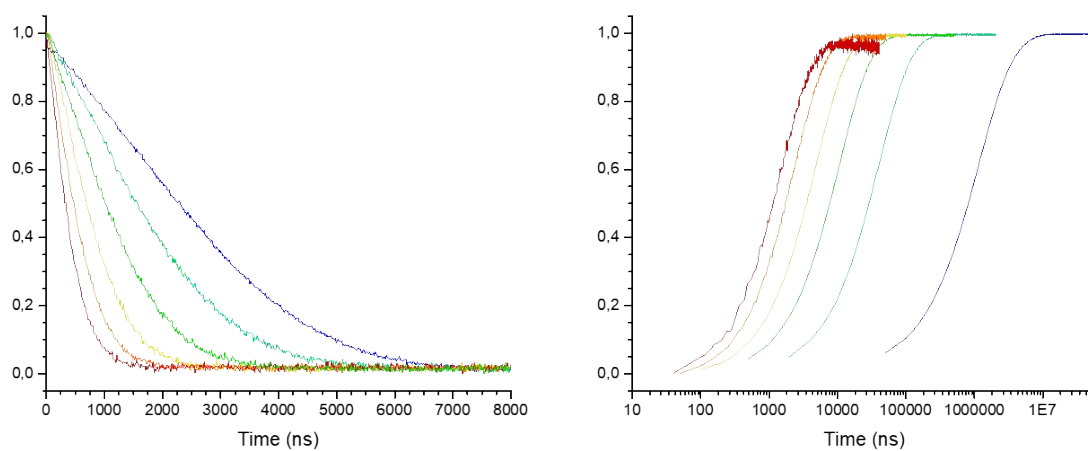

**Figure S7** Variable Temperature electron spin echo decay (left) and inversion recovery (right) data for  $[\text{VO}(\text{ox})_2]^{2-}$  at 1206 mT and 33.748 GHz: 20 K (blue), 50 K (light blue), 80 K (green), 120 K (yellow), 150 K (orange) and 200 K (red).

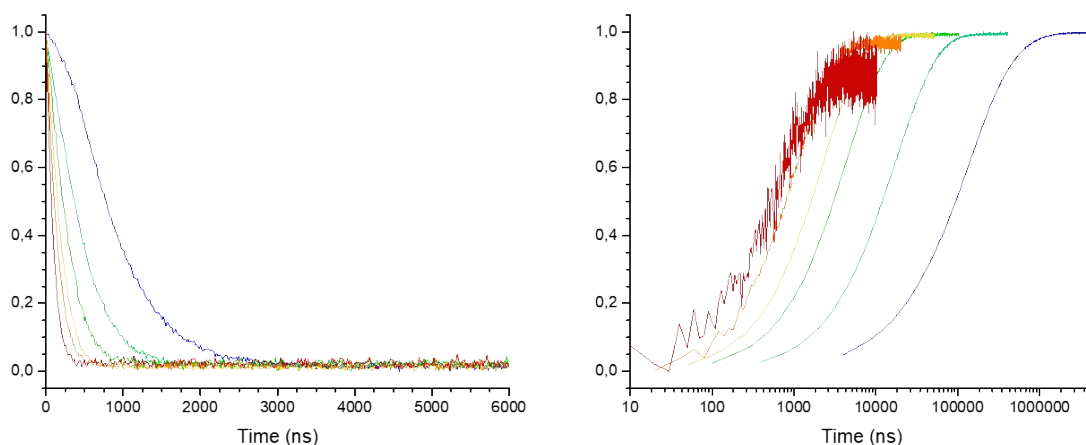

**Figure S8.** Variable Temperature electron spin echo decay (left) and inversion recovery (right) data for [VO(nta)]<sup>3-</sup> at 1207 mT and 33.748 GHz: 20 K (blue), 50 K (light blue), 80 K (green), 120 K (yellow), 150 K (orange) and 200 K (red).

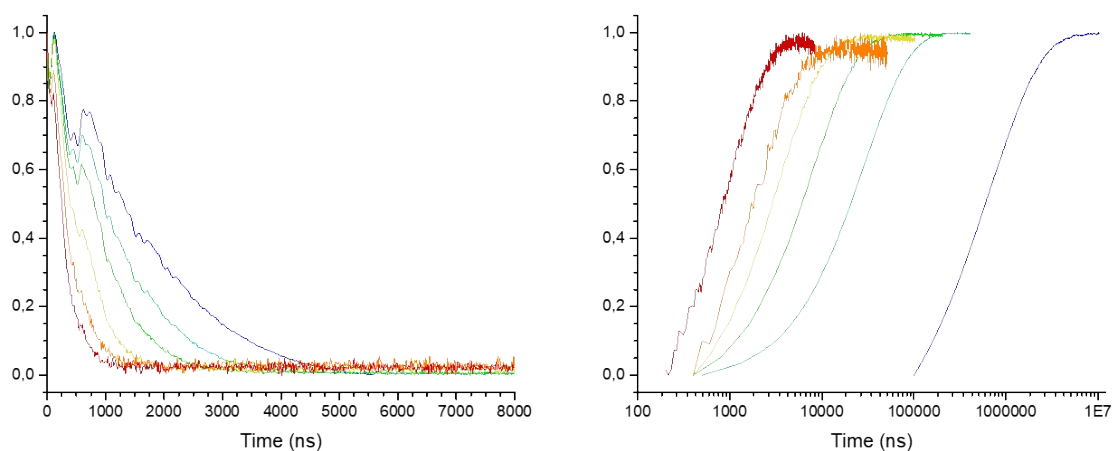

**Figure S9.** Variable Temperature electron spin echo decay (left) and inversion recovery (right) data for [VO(dtpa)]<sup>3-</sup> at 1209 mT and 33.827 GHz: 20 K (blue), 50 K (light blue), 80 K (green), 120 K (yellow), 150 K (orange) and 200 K (red).

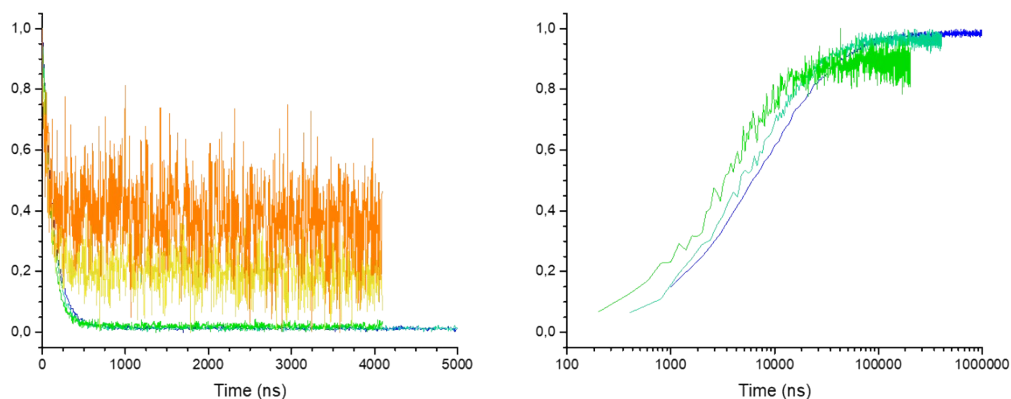

**Figure S10.** Variable Temperature electron spin echo decay (left) and inversion recovery (right) data for  $[\text{VO}(\text{acac})_2]$  at 1206 mT and 33.693 GHz: 20 K (blue), 50 K (light blue), 80 K (green), 120 K (yellow), 150 K (orange) and 200 K (red).

**Table S1.** Rotational correlation time ( $\tau_R$  ( $10^{-11}$  s)) of VO-complexes calculated by EasySpin simulations.

| T (K) | $[\text{VO}(\text{H}_2\text{O})_5]^{2+}$ | $[\text{VO}(\text{dtpa})]^{3-}$ | $[\text{VO}(\text{nta})]^-$ | $[\text{VO}(\text{ox})_2]^{2-}$ | $[\text{VO}(\text{acac})_2]$ |
|-------|------------------------------------------|---------------------------------|-----------------------------|---------------------------------|------------------------------|
| 273   | -                                        | -                               | -                           | 7.69                            | -                            |
| 283   | -                                        | -                               | -                           | 5.41                            | -                            |
| 295   | 5.45                                     | 9.38                            | 4.05                        | 3.84                            | 7.7                          |
| 303   | 4.26                                     | 7.88                            | 3.10                        | 3.23                            | -                            |
| 313   | 3.44                                     | 6.49                            | 2.63                        | 2.67                            | -                            |
| 323   | 2.94                                     | 5.51                            | 2.15                        | 2.43                            | -                            |
| 333   | 2.50                                     | 5.10                            | 1.94                        | 1.92                            | -                            |
| 343   | 2.19                                     | 4.60                            | 1.53                        | 1.57                            | -                            |
| 353   | 1.99                                     | 3.71                            | 1.50                        | 1.45                            | -                            |

**Table S2.**  $T_1^e$  and amplitude fitting values for VO-complexes.

| Samples                                            | T (K) | $T_1^e$ long (ns)    | Amplitude ( $k_m$ ) | $T_1^e$ short (ns)   | Amplitude ( $k_n$ ) |
|----------------------------------------------------|-------|----------------------|---------------------|----------------------|---------------------|
| [VO(H <sub>2</sub> O) <sub>5</sub> ] <sup>2+</sup> | 20    | 9,16*10 <sup>5</sup> | 83000               | 3,22*10 <sup>5</sup> | 44980               |
|                                                    | 50    | 16386                | 66744               | 31028                | 58775               |
|                                                    | 80    | 6755                 | 47007               | 2909                 | 10710               |
|                                                    | 120   | 2447                 | 23221               | 1059                 | 887                 |
|                                                    | 150   | 1331                 | 7342                | 516                  | 909                 |
|                                                    | 200   | 368                  | -                   | 368                  | -                   |
| [VO(nta)] <sup>-</sup>                             | 20    | 2,48*10 <sup>5</sup> | 17552               | 53592                | 12846               |
|                                                    | 50    | 23247                | 20255               | 7345                 | 8247                |
|                                                    | 80    | 6373                 | 15768               | 2189                 | 5404                |
|                                                    | 120   | 2763                 | 11863               | 1125                 | 3364                |
|                                                    | 150   | 1375                 | 6904                | 42                   | 483                 |
|                                                    | 200   | -                    | -                   | -                    | -                   |
| [VO(ox) <sub>2</sub> ] <sup>2-</sup>               | 20    | 2,03*10 <sup>6</sup> | 19493               | 8,33*10 <sup>5</sup> | 24437               |
|                                                    | 50    | 53576                | 16464               | 27641                | 9577                |
|                                                    | 80    | 13881                | 14430               | 7861                 | 9403                |
|                                                    | 120   | 5834                 | 14604               | 3228                 | 4850                |
|                                                    | 150   | 2768                 | 11293               | 1650                 | 3715                |
|                                                    | 200   | 1548                 | 8951                | 681                  | 123                 |
| [VO(dtpa)] <sup>3-</sup>                           | 20    | 1,09*10 <sup>6</sup> | 66250               | 329033               | 39265               |
|                                                    | 50    | 36538                | 151048              | 126411               | 40286               |
|                                                    | 80    | 10123                | 53584               | 4108                 | 17233               |
|                                                    | 120   | 4220                 | 26632               | 1650                 | 6880                |
|                                                    | 150   | 2130                 | 9198                | 330                  | 2239                |
|                                                    | 200   | 873                  | 22792               | 4,5                  | 10290               |
| [VO(acac) <sub>2</sub> ]                           | 20    | 38657                | 8592                | 6444                 | 19521               |
|                                                    | 50    | 17595                | 5868                | 4030                 | 8094                |
|                                                    | 80    | 11404                | 3841                | 3290                 | 11979               |
|                                                    | 120   | -                    | -                   | -                    | -                   |
|                                                    | 150   | -                    | -                   | -                    | -                   |
|                                                    | 200   | -                    | -                   | -                    | -                   |

**Table S3.**  $T_m^e$  and stretch fitting values as a function of temperature for VO<sup>2+</sup> complexes.

| Samples                                            | T (K) | $T_m^e$ (ns) | Stretch factor ( $\beta_m$ ) |
|----------------------------------------------------|-------|--------------|------------------------------|
| [VO(H <sub>2</sub> O) <sub>5</sub> ] <sup>2+</sup> | 20    | 2408         | 1.37                         |
|                                                    | 50    | 1505         | 1.39                         |
|                                                    | 80    | 966          | 1.41                         |
|                                                    | 120   | 616          | 1.37                         |
|                                                    | 150   | 439          | 1.29                         |
|                                                    | 200   | 302          | 1.2                          |
| [VO(nta)] <sup>-</sup>                             | 20    | 569          | 1.09                         |
|                                                    | 50    | 419          | 11.8                         |
|                                                    | 80    | 293          | 1.21                         |
|                                                    | 120   | 193          | 1.17                         |
|                                                    | 150   | 142          | 1.12                         |
|                                                    | 200   | 105          | 1.12                         |
| [VO(ox) <sub>2</sub> ] <sup>2-</sup>               | 20    | 3004         | 1.61                         |
|                                                    | 50    | 2027         | 1.46                         |
|                                                    | 80    | 1329         | 1.42                         |
|                                                    | 120   | 888          | 1.4                          |
|                                                    | 150   | 610          | 1.31                         |
|                                                    | 200   | 438          | 1.26                         |
| [VO(dtpa)] <sup>3-</sup>                           | 20    | 2511         | 1.30                         |
|                                                    | 50    | 1393         | 1.40                         |
|                                                    | 80    | 1028         | 1.39                         |
|                                                    | 120   | 630          | 1.29                         |
|                                                    | 150   | 424          | 1.35                         |
|                                                    | 200   | 331          | 1.41                         |
| [VO(acac) <sub>2</sub> ]                           | 20    | 130          | 1.01                         |
|                                                    | 50    | 120          | 1.03                         |
|                                                    | 80    | 104          | 1.04                         |
|                                                    | 120   | 64           | 0.77                         |
|                                                    | 150   | -            | -                            |
|                                                    | 200   | -            | -                            |

**Table S4.** Cartesian coordinates (Å) obtained with DFT calculations for the  $[\text{VO}(\text{H}_2\text{O})_5]^{2+}$  system.

| Center Number | Atomic Number | Atomic Type | Coordinates (Angstroms) |           |           |
|---------------|---------------|-------------|-------------------------|-----------|-----------|
|               |               |             | X                       | Y         | Z         |
| 1             | 8             | 0           | 0.053171                | 1.535329  | 1.085141  |
| 2             | 8             | 0           | 1.172072                | -1.036773 | 1.153597  |
| 3             | 1             | 0           | 2.118703                | -0.846649 | 1.224208  |
| 4             | 8             | 0           | -1.589064               | -0.657255 | 1.258546  |
| 5             | 1             | 0           | -2.119863               | -1.357732 | 0.852615  |
| 6             | 8             | 0           | -1.426979               | 0.925705  | -1.219444 |
| 7             | 1             | 0           | -1.104154               | 1.566389  | -1.870258 |
| 8             | 8             | 0           | 1.354520                | 0.731070  | -1.194452 |
| 9             | 1             | 0           | 1.728909                | 0.043624  | -1.764017 |
| 10            | 8             | 0           | -0.296632               | -1.542478 | -1.076019 |
| 11            | 1             | 0           | -0.848457               | -1.624739 | -1.864501 |
| 12            | 1             | 0           | -2.321047               | 1.197581  | -0.966524 |
| 13            | 1             | 0           | 2.054895                | 1.365761  | -0.987414 |
| 14            | 1             | 0           | 0.883276                | -1.384263 | 2.010388  |
| 15            | 1             | 0           | -2.161502               | -0.149982 | 1.851187  |
| 16            | 1             | 0           | 0.150539                | -2.387487 | -0.938275 |
| 17            | 23            | 0           | -0.091833               | 0.260088  | 0.188876  |

E(UTPSSh) = -1401.4694392 Hartree

Zero-point correction = 0.129419

Thermal correction to Energy = 0.144493

Thermal correction to Enthalpy = 0.145437

Thermal correction to Gibbs Free Energy = 0.089972

Sum of electronic and zero-point Energies = -1401.340020

Sum of electronic and thermal Energies = -1401.324946

Sum of electronic and thermal Enthalpies = -1401.324002

Sum of electronic and thermal Free Energies = -1401.379467

**Table S5.** Cartesian coordinates (Å) obtained with DFT calculations for the [VO(nta)(H<sub>2</sub>O)]<sup>-</sup> system.

| Center Number | Atomic Number | Atomic Type | Coordinates (Angstroms) |           |           |
|---------------|---------------|-------------|-------------------------|-----------|-----------|
|               |               |             | X                       | Y         | Z         |
| 1             | 23            | 0           | 0.349408                | -0.126231 | 0.870958  |
| 2             | 8             | 0           | -3.442890               | 1.241265  | 1.500400  |
| 3             | 8             | 0           | -1.349009               | 0.488121  | 1.669403  |
| 4             | 8             | 0           | 0.841012                | 1.720994  | 0.360380  |
| 5             | 8             | 0           | -0.458406               | -1.858718 | 0.361623  |
| 6             | 8             | 0           | 1.164403                | -0.420991 | 2.223202  |
| 7             | 8             | 0           | 1.839664                | -0.667516 | -0.548818 |
| 8             | 7             | 0           | -0.968748               | 0.352875  | -1.042096 |
| 9             | 6             | 0           | -2.385748               | 0.863626  | 0.996570  |
| 10            | 6             | 0           | -2.271845               | 0.831598  | -0.528182 |
| 11            | 6             | 0           | 0.553142                | 2.282948  | -0.776815 |
| 12            | 6             | 0           | -0.231900               | 1.405362  | -1.757269 |
| 13            | 8             | 0           | 0.906907                | 3.412844  | -1.099080 |
| 14            | 6             | 0           | -1.045313               | -2.104440 | -0.772780 |
| 15            | 6             | 0           | -1.086586               | -0.928321 | -1.753979 |
| 16            | 8             | 0           | -1.502109               | -3.197485 | -1.092625 |
| 17            | 1             | 0           | 2.116867                | -1.593191 | -0.514516 |
| 18            | 1             | 0           | 2.645101                | -0.133714 | -0.514778 |
| 19            | 1             | 0           | -3.078737               | 0.200393  | -0.906524 |
| 20            | 1             | 0           | -2.468624               | 1.841980  | -0.892948 |
| 21            | 1             | 0           | -0.882754               | 2.029922  | -2.374422 |
| 22            | 1             | 0           | 0.503510                | 0.937654  | -2.414681 |
| 23            | 1             | 0           | -0.226720               | -1.045106 | -2.416431 |
| 24            | 1             | 0           | -1.990241               | -0.988015 | -2.365851 |

E(UTPSSh) = -1834.8344352 Hartree

Zero-point correction = 0.159633

Thermal correction to Energy = 0.176262

Thermal correction to Enthalpy = 0.177206

Thermal correction to Gibbs Free Energy = 0.112451

Sum of electronic and zero-point Energies = -1834.674802

Sum of electronic and thermal Energies = -1834.658174

Sum of electronic and thermal Enthalpies = -1834.657229

Sum of electronic and thermal Free Energies = -1834.721985

**Table S6.** Cartesian coordinates (Å) obtained with DFT calculations for the [VO(nta)(H<sub>2</sub>O)]·2H<sub>2</sub>O system.

| Center Number | Atomic Number | Atomic Type | Coordinates (Angstroms) |           |           |
|---------------|---------------|-------------|-------------------------|-----------|-----------|
|               |               |             | X                       | Y         | Z         |
| 1             | 23            | 0           | 0.001691                | -0.521690 | -0.265951 |
| 2             | 8             | 0           | -0.013486               | 1.525896  | 3.285028  |
| 3             | 8             | 0           | -0.004219               | 0.003321  | 1.651362  |
| 4             | 8             | 0           | 1.928496                | -0.021052 | -0.445063 |
| 5             | 8             | 0           | -1.925798               | -0.026681 | -0.451945 |
| 6             | 8             | 0           | 0.004752                | -2.111357 | -0.042755 |
| 7             | 8             | 0           | 0.005810                | -0.461773 | -2.350231 |
| 8             | 7             | 0           | -0.000201               | 1.844622  | -0.353356 |
| 9             | 6             | 0           | -0.006306               | 1.214982  | 2.093733  |
| 10            | 6             | 0           | 0.003774                | 2.327430  | 1.045814  |
| 11            | 6             | 0           | 2.342646                | 1.169277  | -0.788062 |
| 12            | 6             | 0           | 1.238719                | 2.192145  | -1.064887 |
| 13            | 8             | 0           | 3.521159                | 1.463802  | -0.949032 |
| 14            | 6             | 0           | -2.342987               | 1.163967  | -0.789694 |
| 15            | 6             | 0           | -1.242208               | 2.192134  | -1.059532 |
| 16            | 8             | 0           | -3.522029               | 1.455501  | -0.952127 |
| 17            | 1             | 0           | -0.801501               | -0.926525 | -2.691935 |
| 18            | 1             | 0           | 0.814531                | -0.927414 | -2.687213 |
| 19            | 1             | 0           | -0.864995               | 2.963936  | 1.226580  |
| 20            | 1             | 0           | 0.886507                | 2.944339  | 1.226795  |
| 21            | 1             | 0           | 1.595469                | 3.196687  | -0.824363 |
| 22            | 1             | 0           | 1.049934                | 2.150390  | -2.139389 |
| 23            | 1             | 0           | -1.055625               | 2.160168  | -2.134818 |
| 24            | 1             | 0           | -1.602089               | 3.193432  | -0.810391 |
| 25            | 8             | 0           | -2.416165               | -1.536301 | -2.804990 |
| 26            | 1             | 0           | -2.481391               | -2.498642 | -2.774540 |
| 27            | 1             | 0           | -2.621879               | -1.233411 | -1.901172 |
| 28            | 8             | 0           | 2.429806                | -1.540399 | -2.788851 |
| 29            | 1             | 0           | 2.491615                | -2.502765 | -2.752702 |
| 30            | 1             | 0           | 2.631355                | -1.233512 | -1.885405 |

E (UTPSSh) = -1987.7904187 Hartree

Zero-point correction = 0.209399

Thermal correction to Energy = 0.231174

Thermal correction to Enthalpy = 0.232118

Thermal correction to Gibbs Free Energy = 0.157372

Sum of electronic and zero-point Energies = -1987.581019

Sum of electronic and thermal Energies = -1987.559245

Sum of electronic and thermal Enthalpies = -1987.558301

Sum of electronic and thermal Free Energies = -1987.633047



**Table S7.** Cartesian coordinates (Å) obtained with DFT calculations for the [VO(Hdtpa)]<sup>2-</sup> system.

| Center Number | Atomic Number | Atomic Type | Coordinates (Angstroms) |           |           |
|---------------|---------------|-------------|-------------------------|-----------|-----------|
|               |               |             | X                       | Y         | Z         |
| 1             | 23            | 0           | 3.916782                | 1.692652  | -0.017927 |
| 2             | 8             | 0           | 5.298074                | 1.459505  | -0.813991 |
| 3             | 8             | 0           | 2.539011                | 1.634859  | -1.448533 |
| 4             | 8             | 0           | 0.436800                | 1.196102  | -2.072667 |
| 5             | 8             | 0           | 3.952896                | 3.684578  | 0.073676  |
| 6             | 8             | 0           | 2.992414                | 5.670540  | 0.435644  |
| 7             | 8             | 0           | 3.357921                | -0.136594 | 0.516616  |
| 8             | 8             | 0           | 3.583743                | -1.812174 | 1.982601  |
| 9             | 8             | 0           | 7.399990                | 6.559266  | 0.877750  |
| 10            | 8             | 0           | 7.790317                | 5.414241  | 2.791243  |
| 11            | 8             | 0           | 11.044586               | 1.302741  | 2.658591  |
| 12            | 8             | 0           | 9.334955                | 2.198294  | 3.841019  |
| 13            | 7             | 0           | 1.879793                | 2.258332  | 1.022607  |
| 14            | 7             | 0           | 4.531655                | 1.677385  | 2.103506  |
| 15            | 7             | 0           | 8.037192                | 3.093172  | 1.690911  |
| 16            | 6             | 0           | 2.039605                | 1.854506  | 2.430306  |
| 17            | 6             | 0           | 3.416756                | 2.267660  | 2.918520  |
| 18            | 6             | 0           | 5.746673                | 2.489196  | 2.424529  |
| 19            | 6             | 0           | 7.027727                | 1.986281  | 1.764809  |
| 20            | 6             | 0           | 0.878156                | 1.490699  | 0.268231  |
| 21            | 6             | 0           | 1.278341                | 1.435769  | -1.210291 |
| 22            | 6             | 0           | 1.691631                | 3.713148  | 0.858293  |
| 23            | 6             | 0           | 2.965677                | 4.441993  | 0.433151  |
| 24            | 6             | 0           | 4.718781                | 0.240069  | 2.442470  |
| 25            | 6             | 0           | 3.809397                | -0.665391 | 1.614796  |
| 26            | 6             | 0           | 7.666715                | 4.203986  | 0.747555  |
| 27            | 6             | 0           | 7.616900                | 5.531806  | 1.547166  |
| 28            | 6             | 0           | 9.415315                | 2.542266  | 1.481780  |
| 29            | 6             | 0           | 9.981731                | 1.945870  | 2.793889  |
| 30            | 1             | 0           | 8.071400                | 3.586885  | 2.614597  |
| 31            | 1             | 0           | 1.283915                | 2.317632  | 3.075525  |
| 32            | 1             | 0           | 1.904714                | 0.775582  | 2.493842  |
| 33            | 1             | 0           | 3.550719                | 1.987321  | 3.967353  |
| 34            | 1             | 0           | 3.519260                | 3.351322  | 2.852898  |
| 35            | 1             | 0           | 5.523263                | 3.500788  | 2.088200  |
| 36            | 1             | 0           | 5.878516                | 2.516258  | 3.510965  |
| 37            | 1             | 0           | 6.842879                | 1.644469  | 0.747121  |
| 38            | 1             | 0           | 7.492950                | 1.197221  | 2.350704  |
| 39            | 1             | 0           | -0.130675               | 1.899840  | 0.368553  |
| 40            | 1             | 0           | 0.869827                | 0.463992  | 0.636183  |
| 41            | 1             | 0           | 0.949887                | 3.893026  | 0.077578  |
| 42            | 1             | 0           | 1.303631                | 4.170034  | 1.772769  |
| 43            | 1             | 0           | 5.739484                | -0.051640 | 2.193770  |
| 44            | 1             | 0           | 4.571221                | 0.060655  | 3.509651  |
| 45            | 1             | 0           | 6.692652                | 3.996975  | 0.305798  |
| 46            | 1             | 0           | 8.403605                | 4.256366  | -0.050247 |
| 47            | 1             | 0           | 10.052805               | 3.368289  | 1.167126  |
| 48            | 1             | 0           | 9.379015                | 1.803726  | 0.682563  |

E (UTPSSh) = -2481.9306069 Hartree

Zero-point correction = 0.357959

Thermal correction to Energy = 0.386300

Thermal correction to Enthalpy = 0.387244

Thermal correction to Gibbs Free Energy = 0.295400  
 Sum of electronic and zero-point Energies = -2481.572648  
 Sum of electronic and thermal Energies = -2481.544307  
 Sum of electronic and thermal Enthalpies = -2481.543363  
 Sum of electronic and thermal Free Energies = -2481.635207

**Table S8.** Cartesian coordinates (Å) obtained with DFT calculations for the  $[\text{VO}(\text{ox})_2(\text{H}_2\text{O})]^{2-}$  system.

| Center Number | Atomic Number | Atomic Type | Coordinates (Angstroms) |           |           |
|---------------|---------------|-------------|-------------------------|-----------|-----------|
|               |               |             | X                       | Y         | Z         |
| 1             | 8             | 0           | -0.508140               | 1.946810  | -1.268865 |
| 2             | 8             | 0           | 0.587009                | -0.878003 | 0.879511  |
| 3             | 8             | 0           | -1.653912               | 0.763737  | 1.052205  |
| 4             | 8             | 0           | -1.638139               | -0.687047 | -1.074445 |
| 5             | 8             | 0           | 1.098244                | -0.252669 | -1.559017 |
| 6             | 8             | 0           | 1.113763                | 1.692441  | 0.854305  |
| 7             | 1             | 0           | 1.754589                | 2.220853  | 0.361457  |
| 8             | 1             | 0           | 1.612466                | 1.003060  | 1.317706  |
| 9             | 23            | 0           | -0.305593               | 0.602672  | -0.400964 |
| 10            | 6             | 0           | 1.748960                | -1.293887 | -1.152100 |
| 11            | 6             | 0           | 1.418424                | -1.687649 | 0.320233  |
| 12            | 6             | 0           | -2.701289               | -0.859335 | -0.344945 |
| 13            | 6             | 0           | -2.708512               | 0.018014  | 0.942848  |
| 14            | 8             | 0           | -3.638566               | -0.022564 | 1.738923  |
| 15            | 8             | 0           | -3.621289               | -1.620617 | -0.610249 |
| 16            | 8             | 0           | 1.937021                | -2.674339 | 0.840861  |
| 17            | 8             | 0           | 2.561539                | -1.927351 | -1.821694 |

E(UTPSSh) = -1850.8843546 Hartree  
 Zero-point correction = 0.080395  
 Thermal correction to Energy = 0.096177  
 Thermal correction to Enthalpy = 0.097122  
 Thermal correction to Gibbs Free Energy = 0.035603  
 Sum of electronic and zero-point Energies = -1850.803960  
 Sum of electronic and thermal Energies = -1850.788177  
 Sum of electronic and thermal Enthalpies = -1850.787233  
 Sum of electronic and thermal Free Energies = -1850.848751

**Table S9.** Cartesian coordinates (Å) obtained with DFT calculations for the  $[\text{VO}(\text{ox})_2(\text{H}_2\text{O})]^{2-} \cdot 2\text{H}_2\text{O}$  system.

| Center Number | Atomic Number | Atomic Type | Coordinates (Angstroms) |           |           |
|---------------|---------------|-------------|-------------------------|-----------|-----------|
|               |               |             | X                       | Y         | Z         |
| 1             | 8             | 0           | -0.791500               | 1.904637  | -1.023683 |
| 2             | 8             | 0           | 0.688786                | -1.090429 | 0.600458  |
| 3             | 8             | 0           | -1.605481               | 0.354425  | 1.247977  |
| 4             | 8             | 0           | -1.726367               | -0.800188 | -1.041768 |
| 5             | 8             | 0           | 0.886454                | -0.107624 | -1.763277 |
| 6             | 8             | 0           | 1.017670                | 1.540833  | 0.869621  |
| 7             | 1             | 0           | 1.293689                | 2.388909  | 0.454894  |
| 8             | 1             | 0           | 1.799983                | 1.090068  | 1.271504  |
| 9             | 8             | 0           | 1.133733                | 3.769194  | -0.687312 |
| 10            | 1             | 0           | 0.330882                | 3.267406  | -0.965625 |
| 11            | 1             | 0           | 0.800482                | 4.565542  | -0.257255 |
| 12            | 8             | 0           | 3.085541                | 0.223822  | 2.116958  |
| 13            | 1             | 0           | 3.969429                | 0.564468  | 1.935214  |
| 14            | 1             | 0           | 3.063693                | -0.664788 | 1.700490  |
| 15            | 23            | 0           | -0.406456               | 0.482778  | -0.327989 |
| 16            | 6             | 0           | 1.754860                | -1.031119 | -1.513887 |
| 17            | 6             | 0           | 1.742615                | -1.458646 | -0.021522 |
| 18            | 6             | 0           | -2.714075               | -1.120507 | -0.259269 |
| 19            | 6             | 0           | -2.634251               | -0.427393 | 1.132754  |
| 20            | 8             | 0           | -3.477873               | -0.625447 | 1.997492  |
| 21            | 8             | 0           | -3.628279               | -1.879571 | -0.549960 |
| 22            | 8             | 0           | 2.716945                | -2.037855 | 0.485066  |
| 23            | 8             | 0           | 2.531171                | -1.523799 | -2.328470 |

E(UTPSSh) = -2003.8408704 Hartree

Zero-point correction = 0.130359

Thermal correction to Energy = 0.150910

Thermal correction to Enthalpy = 0.151854

Thermal correction to Gibbs Free Energy = 0.079621

Sum of electronic and zero-point Energies = -2003.710512

Sum of electronic and thermal Energies = -2003.689960

Sum of electronic and thermal Enthalpies = -2003.689016

Sum of electronic and thermal Free Energies = -2003.761249

**Table S10.** Cartesian coordinates (Å) obtained with DFT calculations for the [VO(acac)<sub>2</sub>(H<sub>2</sub>O)] system.

| Center Number | Atomic Number | Atomic Type | Coordinates (Angstroms) |           |           |
|---------------|---------------|-------------|-------------------------|-----------|-----------|
|               |               |             | X                       | Y         | Z         |
| 1             | 8             | 0           | -0.204392               | 0.393633  | -2.446250 |
| 2             | 8             | 0           | -1.580493               | -1.181290 | -0.591895 |
| 3             | 8             | 0           | 1.157186                | -1.323990 | -0.722780 |
| 4             | 8             | 0           | 1.317316                | 1.427080  | -0.343972 |
| 5             | 8             | 0           | -1.421391               | 1.577601  | -0.231887 |
| 6             | 8             | 0           | -0.093495               | -0.158773 | 1.590075  |
| 7             | 1             | 0           | 0.507796                | 0.477292  | 1.998264  |
| 8             | 1             | 0           | 0.285177                | -1.024488 | 1.790153  |
| 9             | 23            | 0           | -0.152586               | 0.178983  | -0.864708 |
| 10            | 6             | 0           | -2.666456               | 1.457124  | 0.039267  |
| 11            | 6             | 0           | -2.808387               | -0.993590 | -0.280774 |
| 12            | 6             | 0           | 2.578472                | 1.199435  | -0.350215 |
| 13            | 6             | 0           | 2.435280                | -1.249129 | -0.683898 |
| 14            | 6             | 0           | -3.375175               | 0.250479  | 0.016778  |
| 15            | 6             | 0           | -3.371022               | 2.732268  | 0.411508  |
| 16            | 1             | 0           | -2.884063               | 3.169584  | 1.286598  |
| 17            | 1             | 0           | -3.273695               | 3.450344  | -0.406285 |
| 18            | 1             | 0           | -4.425177               | 2.570224  | 0.627812  |
| 19            | 6             | 0           | -3.658101               | -2.233314 | -0.237779 |
| 20            | 1             | 0           | -3.632471               | -2.722365 | -1.214566 |
| 21            | 1             | 0           | -3.235532               | -2.933855 | 0.486656  |
| 22            | 1             | 0           | -4.689725               | -2.014159 | 0.030563  |
| 23            | 1             | 0           | -4.425663               | 0.278277  | 0.268834  |
| 24            | 6             | 0           | 3.159158                | -0.060002 | -0.536760 |
| 25            | 1             | 0           | 4.237552                | -0.125997 | -0.514332 |
| 26            | 6             | 0           | 3.162024                | -2.560823 | -0.788890 |
| 27            | 1             | 0           | 2.832188                | -3.220808 | 0.017060  |
| 28            | 1             | 0           | 2.897051                | -3.044207 | -1.732418 |
| 29            | 1             | 0           | 4.241845                | -2.436707 | -0.736417 |
| 30            | 6             | 0           | 3.451447                | 2.400582  | -0.116442 |
| 31            | 1             | 0           | 3.257459                | 3.142760  | -0.894716 |
| 32            | 1             | 0           | 3.187050                | 2.857657  | 0.840147  |
| 33            | 1             | 0           | 4.509150                | 2.144792  | -0.115851 |

E(UTPSSh) = -1786.6843756 Hartree

Zero-point correction = 0.251678

Thermal correction to Energy = 0.274121

Thermal correction to Enthalpy = 0.275065

Thermal correction to Gibbs Free Energy = 0.199057

Sum of electronic and zero-point Energies = -1786.432698

Sum of electronic and thermal Energies = -1786.410255

Sum of electronic and thermal Enthalpies = -1786.409311

Sum of electronic and thermal Free Energies = -1786.485318

**Table S11.** Cartesian coordinates (Å) obtained with DFT calculations for the [VO(acac)<sub>2</sub>(H<sub>2</sub>O)]·2H<sub>2</sub>O system.

| Center Number | Atomic Number | Atomic Type | Coordinates (Angstroms) |           |           |
|---------------|---------------|-------------|-------------------------|-----------|-----------|
|               |               |             | X                       | Y         | Z         |
| 1             | 8             | 0           | -0.017798               | -0.282798 | -2.209224 |
| 2             | 8             | 0           | -1.317326               | -1.587631 | -0.156450 |
| 3             | 8             | 0           | 1.471250                | -1.279965 | -0.113072 |
| 4             | 8             | 0           | 1.182189                | 1.477685  | -0.458227 |
| 5             | 8             | 0           | -1.607911               | 1.189851  | -0.503193 |
| 6             | 8             | 0           | -0.255047               | 0.179538  | 1.689634  |
| 7             | 1             | 0           | 0.050921                | 1.057714  | 2.000271  |
| 8             | 1             | 0           | 0.216098                | -0.515528 | 2.195946  |
| 9             | 8             | 0           | 0.546239                | 2.816914  | 1.935049  |
| 10            | 1             | 0           | 0.710919                | 2.669918  | 0.984780  |
| 11            | 1             | 0           | -0.200104               | 3.427033  | 1.972475  |
| 12            | 8             | 0           | 1.061212                | -2.097310 | 2.549627  |
| 13            | 1             | 0           | 1.217049                | -2.156751 | 1.588422  |
| 14            | 1             | 0           | 0.451582                | -2.816737 | 2.753281  |
| 15            | 23            | 0           | -0.089123               | -0.091840 | -0.624306 |
| 16            | 6             | 0           | -2.838827               | 0.921435  | -0.277946 |
| 17            | 6             | 0           | -2.582269               | -1.529098 | 0.028811  |
| 18            | 6             | 0           | 2.441843                | 1.418846  | -0.706023 |
| 19            | 6             | 0           | 2.698199                | -1.027380 | -0.400010 |
| 20            | 6             | 0           | -3.348296               | -0.358462 | -0.027800 |
| 21            | 6             | 0           | -3.766911               | 2.104737  | -0.289502 |
| 22            | 1             | 0           | -3.439693               | 2.824954  | 0.464453  |
| 23            | 1             | 0           | -3.705847               | 2.601819  | -1.260663 |
| 24            | 1             | 0           | -4.798574               | 1.819428  | -0.093316 |
| 25            | 6             | 0           | -3.248893               | -2.842944 | 0.330669  |
| 26            | 1             | 0           | -3.063907               | -3.538794 | -0.491252 |
| 27            | 1             | 0           | -2.800268               | -3.275157 | 1.228529  |
| 28            | 1             | 0           | -4.321565               | -2.734756 | 0.478628  |
| 29            | 1             | 0           | -4.410816               | -0.447595 | 0.148750  |
| 30            | 6             | 0           | 3.183364                | 0.233651  | -0.763791 |
| 31            | 1             | 0           | 4.237403                | 0.316174  | -0.986973 |
| 32            | 6             | 0           | 3.645076                | -2.188073 | -0.288435 |
| 33            | 1             | 0           | 3.643259                | -2.559853 | 0.739666  |
| 34            | 1             | 0           | 3.295583                | -3.001533 | -0.928443 |
| 35            | 1             | 0           | 4.660658                | -1.914751 | -0.566643 |
| 36            | 6             | 0           | 3.128575                | 2.739835  | -0.905056 |
| 37            | 1             | 0           | 2.638835                | 3.282036  | -1.717271 |
| 38            | 1             | 0           | 3.021664                | 3.344056  | -0.000268 |
| 39            | 1             | 0           | 4.186008                | 2.620393  | -1.131048 |

E (UTPSSh) = -1939.6333193 Hartree

Zero-point correction = 0.301741

Thermal correction to Energy = 0.329230

Thermal correction to Enthalpy = 0.330174

Thermal correction to Gibbs Free Energy = 0.242921

Sum of electronic and zero-point Energies = -1939.331578

Sum of electronic and thermal Energies = -1939.304089

Sum of electronic and thermal Enthalpies = -1939.303145

Sum of electronic and thermal Free Energies = -1939.390399
